# Supplementary material
Source: Elsevier journal article supplement (https://www.sciencedirect.com/science/article/pii/S087025512300046X)
Supplement: mmc1 [file S087025512300046X:mmc1.doc]

**Table S1.** Comparison of the general characteristics of the included *versus* excluded INSEF mainland participants.

| **Characteristics** | **Included participants**  **(n=2272)** | **Excluded participants**  **(n=1195)** | **Total mainland INSEF participants (n=3467)** |
| --- | --- | --- | --- |
| Sex (n=3467) - % |  |  |  |
| Males  Females | 47.2  52.8 | 48.7  51.3 | 47.5  52.5 |
| Age group (n=3467) - % |  |  |  |
| 25-49 years  50-74 years | 53.0  47.0 | 50.8  49.2 | 52.5  47.5 |
| aLevel of Education (n=3464) - % |  |  |  |
| Low education  Medium education  High education | 57.8  21.9  20.3 | 63.3  20.2  16.5 | 58.9  21.6  19.5 |
| bOccupation (n=3200) - %  White-collar occupation | 63.6 | 56.3 | 62.2 |
| Blue-collar occupation | 36.4 | 43.7 | 37.8 |
| Lifestyles variables - % |  |  |  |
| cSmokers (n=3465)  dExcessive alcohol consumption(n=3465)  eUnhealthy Diet (n=3463)  fSedentary (n=3443) | 21.5  35.8  36.4  45.0 | 23.6  36.9  35.5  43.6 | 21.9  36.1  36.2  44.7 |
| g Hypertension (n=3466) - %  h Hypertensive medication (n=3467) - % | 36.4  25.1 | 35.0  25.0 | 36.1  25.1 |

a Low education: levels 0–2 of the ISCED 2011; medium education: levels 3–4 of the ISCED 2011; high

education: levels 5–8 of the ISCED 2011; b White-collar occupation: Managers, Professionals, Technicians and Associate Professional, Clerical Support Workers and Services and Sales Workers; Blue-collar occupation: Skilled Agricultural Workers, Craft and Related trades Workers, Plant and Machine Operators and Elementary occupations; c Smokers include current daily and occasional smokers; d 3 or more days/week of consumption of at least one of the following alcoholic beverages (wine, beer, brandy/spirits, port wine/martini/liqueur, whisky/gin/vodka); e No consumption of fruit and vegetables at least once a day; f Reading, watching TV or other sedentary activities declared as the best description of the leisure time activities during the last 12 months; g defined as defined as measured SBP ≥140 mmHg or measured DBP ≥90 mmHg or self-report of taking antihypertensive medication; h self-report of taking antihypertensive medication.

**Table S2.** Percent changes in DBP and SBP per 10 µg/m3 increment of PM10 according to sex after restricting participants to those living within a 20km radius of at least one air quality monitoring station with available PM10 measurements.

|  | % Change per 1 µg/m3 of PM10 increment | |
| --- | --- | --- |
|  | DBP | SBP |
| Total (n=1740) |  |  |
| Unadjusted model | -0.71 (-2.03; 0.61) | -0.33 (-1.65; 0.99) |
| *Adjusted model | 0.51 (-1.35; 2.37) | 0.75 (-1.02; 2.53) |
| Males (n=797) |  |  |
| Unadjusted model | -0.39 (-1.96; 1.17) | -0.06 (-1.53; 1.42) |
| *Adjusted model | 0.26 (-1.75; 2.27) | 1.06 (-1.30; 3.43) |
| Females (n=943) |  |  |
| Unadjusted model | -0.84 (-3.29; 1.63) | -0.38 (-2.88; 2.13) |
| *Adjusted model | 0.61 (-2.30; 3.53) | 0.41 (-2.54; 3.37) |

*adjusted for age, sex, educational level, occupation, smoking status, excessive alcohol consumption, unhealthy diet, sedentary, individual allocated ambient temperature, individual allocated 1-year average PM10 concentrations.Abbreviations: DBP, Diastolic blood pressure; SBP, Systolic blood pressure.

**Table S3.** Percent changes in DBP and SBP per 10 µg/m3 increment of PM10 according to sex considering a different previous period of exposure (2 previous days’ average PM10 concentrations instead of 3 previous days’ average PM10 concentrations).

|  | % Change per 1 µg/m3 of PM10 increment | |
| --- | --- | --- |
|  | DBP | SBP |
| Total (n=2272) |  |  |
| Unadjusted model | -0.85 (-1.86; 0.16) | -0.71 (-1.78; 0.37) |
| *Adjusted model | -0.12 (-1.41; 1.18) | 0.00 (-1.05; 1.06) |
| Males (n=1037) |  |  |
| Unadjusted model | -0.82 (-1.88; 0.23) | -0.76 (-1.87; 0.35) |
| *Adjusted model | -0.63 (-1.55; 0.30) | 0.05 (-1.16; 1.25) |
| Females (n=1235) |  |  |
| Unadjusted model | -0.85 (-2.66; 0.95) | -0.62 (-2.52; 1.28) |
| *Adjusted model | 0.25 (-1.82; 2.32) | -0.17 (-2.07; 1.74) |

*adjusted for age, sex, educational level, occupation, smoking status, excessive alcohol consumption, unhealthy diet, sedentary, individual allocated ambient temperature, individual allocated 1-year average PM10 concentrations.Abbreviations: DBP, Diastolic blood pressure; SBP, Systolic blood pressure.

**Table S4.** Percent changes in DBP and SBP per 10 µg/m3 increment of PM10 according to sex considering a different previous period of time (5 previous days’ average PM10 concentrations instead of 3 previous days’ average PM10 concentrations).

|  | % Change per 1 µg/m3 of PM10 increment | |
| --- | --- | --- |
|  | DBP | SBP |
| Total (n=2272) |  |  |
| Unadjusted model | -0.83 (-2.26; 0.60) | 0.60 (-2.04; 0.84) |
| *Adjusted model | 0.59 (-0.61; 1.79) | 0.53 (-0.86; 1.92) |
| Males (n=1037) |  |  |
| Unadjusted model | -0.55 (-2.08; 0.98) | 0.53 (-2.11; 1.05) |
| *Adjusted model | 0.29 (-0.86; 1.44) | 0.66 -0.65; 1.98) |
| Females (n=1235) |  |  |
| Unadjusted model | -1.04 (-3.12; 1.06) | 0.58 (-2.76; 1.60) |
| *Adjusted model | 0.80 (-1.05; 2.65) | 0.41 (-1.85; 2.68) |

*adjusted for age, sex, educational level, occupation, smoking status, excessive alcohol consumption, unhealthy diet, sedentary, individual allocated ambient temperature, individual allocated 1-year average PM10 concentrations.Abbreviations: DBP, Diastolic blood pressure; SBP, Systolic blood pressure.

**Table S5.** Percent changes in DBP and SBP per 10 µg/m3 increment of PM10 according to sex when considering the PM10 obtained by the air quality modelling system (WRF-CAMx).

|  | % Change per 1 µg/m3 of PM10 increment | |
| --- | --- | --- |
|  | DBP | SBP |
| Total (n=2272) |  |  |
| Unadjusted model | 0.08 (-0.99; 1.16) | 0.11 (-0.74; 0.95) |
| *Adjusted model | 0.33 (-0.97; 1.63) | 0.44 (-0.54; 1.41) |
| Males (n=1037) |  |  |
| Unadjusted model | -0.13 (-1.01; 0.76) | 0.03 (-0.75; 0.81) |
| *Adjusted model | -0.16 (-1.44; 1.12) | 0.22 (-0.90; 1.35) |
| Females (n=1235) |  |  |
| Unadjusted model | 0.50 (-1.04; 2.04) | 0.48 (-0.76; 1.72) |
| *Adjusted model | 0.74 (-1.04; 2.52) | 0.54 (-0.75; 1.82) |

*adjusted for age, sex, educational level, occupation, smoking status, excessive alcohol consumption, unhealthy diet, sedentary, individual allocated ambient temperature, individual allocated 1-year average PM10 concentrations.Abbreviations: DBP, Diastolic blood pressure; SBP, Systolic blood pressure.

**Table S6.** Percent changes in DBP and SBP per 10 µg/m3 increment of PM10 according to sex after exclusion of participants taking hypertensive medication.

|  | % Change per 1 µg/m3 of PM10 increment | |
| --- | --- | --- |
|  | DBP | SBP |
| Total (n=1688) |  |  |
| Unadjusted model | -0.97 (-2.22; 0.29) | -0.43 (-1.69; 0.83) |
| *Adjusted model | 0.05 (-1.41; 1.51) | 0.43 (-0.88; 1.74) |
| Males (n=776) |  |  |
| Unadjusted model | -0.82 (-2.11; 0.48) | -0.33 (-1.49; 0.82) |
| *Adjusted model | -0.23 (-1.93; 1.46) | 0.76 (-0.45; 1.97) |
| Females (n=912) |  |  |
| Unadjusted model | -1.10 (-3.28; 1.08) | -0.51 (-2.75; 1.73) |
| *Adjusted model | 0.31 (-2.01; 2.64) | 0.13 (-2.30; 2.56) |

*adjusted for age, sex, educational level, occupation, smoking status, excessive alcohol consumption, unhealthy diet, sedentary, individual allocated ambient temperature, individual allocated 1-year average PM10 concentrations.Abbreviations: DBP, Diastolic blood pressure; SBP, Systolic blood pressure.

**Table S7.** Percent changes in DBP and SBP per 10 µg/m3 increment of PM10 according to sex after restricting participants to those having hypertension (defined as SBP ≥140 mmHg and/or DBP ≥90 mmHg or taking antihypertensive medication).

|  | % Change per 1 µg/m3 of PM10 increment | |
| --- | --- | --- |
|  | DBP | SBP |
| Total (n=851) |  |  |
| Unadjusted model | -0.43 (-2.20; 1.34) | -0.44 (-2.21; 1.34) |
| *Adjusted model | 0.47 (-1.42; 1.52) | 0.29 (-1.61; 2.20) |
| Males (n=440) |  |  |
| Unadjusted model | -0.42 (-2.83; 2.00) | -0.22 (-2.56; 2.11) |
| *Adjusted model | -0.45 (-3.37; 2.49) | 0.31 (-2.83; 3.53) |
| Females (n=411) |  |  |
| Unadjusted model | -0.31 (-2.83; 2.21) | -0.57 (-2.99; 1.86) |
| *Adjusted model | 0.68 (-1.89; 3.26) | 0.04 (-2.71; 2.79) |

*adjusted for age, sex, educational level, occupation, smoking status, excessive alcohol consumption, unhealthy diet, sedentary, individual allocated ambient temperature, individual allocated 1-year average PM10 concentrations.Abbreviations: DBP, Diastolic blood pressure; SBP, Systolic blood pressure.

**Table S8.** Percent changes in DBP and SBP per 10 µg/m3 increment of PM10 according to sex after restricting participants to those with abdominal obesity (Waist to height ratio >0.5).

|  | % Change per 1 µg/m3 of PM10 increment | |
| --- | --- | --- |
|  | DBP | SBP |
| Total (n=1738) |  |  |
| Unadjusted model | -0.88 (-1.93; 0.18) | -0.62 (-1.87; 0.62) |
| *Adjusted model | 0.08 (-1.06; 1.23) | 0.31 (-1.12; 1.74) |
| Males (n=829) |  |  |
| Unadjusted model | -0.61 (-1.80; 0.58) | -0.42 (-1.76; 0.92) |
| *Adjusted model | -0.42 (-1.88; 1.04) | 0.54 (-1.50; 2.58) |
| Females (n=909) |  |  |
| Unadjusted model | -1.14 (-2.85; 0.58) | -0.82 (-2.69; 1.05) |
| *Adjusted model | 0.40 (-1.43; 2.24) | 0.95 (-2.06; 1.87) |

*adjusted for age, sex, educational level, occupation, smoking status, excessive alcohol consumption, unhealthy diet, sedentary, individual allocated ambient temperature, individual allocated 1-year average PM10 concentrations.Abbreviations: DBP, Diastolic blood pressure; SBP, Systolic blood pressure.

**Table S9**–Changes in DBP and SBP (mmHg) per 10 µg/m3 increment of PM10 according to sex.

|  | mmHg change per 10 µg/m3 of PM10 increment | |
| --- | --- | --- |
|  | DBP | SBP |
| Total (n=2272) |  |  |
| Unadjusted model | -0.53 (-1.41;0.35) | -0.74 (-2.34; 0.86) |
| *Adjusted model | 0.33 (-0,62;1.27) | 0.57 (-1.10; 2.54) |
| Males (n=1037) |  |  |
| Unadjusted model | -0.46 (-1.48;0.55) | -0.64 (-2.42; 1.14) |
| *Adjusted model | -0.02 (-0.83;0.79) | 0.88 (-1.04; 2.80) |
| Females (n=1235) |  |  |
| Unadjusted model | -0.56 (-2.04; 0.90) | -0.77 (-3.31;1.76) |
| *Adjusted model | 0.58 (-0.96; 2.12) | 0.19 (-2.36; 2.74) |

*adjusted for age, sex, educational level, occupation, smoking status, excessive alcohol consumption, unhealthy diet, sedentary, individual allocated ambient temperature, individual allocated 1-year average of PM10 concentrations.Abbreviations: DBP, Diastolic blood pressure; SBP, Systolic blood pressure.
